# Supplementary material for: Experiences of medical and dental students of Pakistan during COVID-19 pandemic lockdown: a qualitative study
Source: PubMed Central journal article supplement — BMJ Open. 2022 Nov 30;12(11):e066442. doi: 10.1136/bmjopen-2022-066442 (PMC9716407; doi:10.1136/bmjopen-2022-066442), 2022-11-30
Supplement: bmjopen-2022-066442.reviewer_comments.pdf [file bmjopen-2022-066442.reviewer_comments.pdf]

## PEER REVIEW HISTORY

BMJ Open publishes all reviews undertaken for accepted manuscripts. Reviewers are asked to complete a checklist review form (<http://bmjopen.bmj.com/site/about/resources/checklist.pdf>) and are provided with free text boxes to elaborate on their assessment. These free text comments are reproduced below.

### ARTICLE DETAILS

|                            |                                                                                                               |
|----------------------------|---------------------------------------------------------------------------------------------------------------|
| <b>TITLE (PROVISIONAL)</b> | EXPERIENCES OF MEDICAL AND DENTAL STUDENTS OF PAKISTAN DURING COVID-19 PANDEMIC LOCKDOWN: A QUALITATIVE STUDY |
| <b>AUTHORS</b>             | Iftikhar, Sundus; Saleem, Sarosh; Aziz, Iqra; Sana, Momal                                                     |

### VERSION 1 – REVIEW

|                        |                                                          |
|------------------------|----------------------------------------------------------|
| <b>REVIEWER</b>        | Sara Rizvi Jafree<br>Forman Christian College, Sociology |
| <b>REVIEW RETURNED</b> | 25-Jul-2022                                              |

|                         |                                                                                                                                                                                                                                                                                                                                                                                                                                                                                                                                                                                                                                                                                                                                                                                                                                                                                                          |
|-------------------------|----------------------------------------------------------------------------------------------------------------------------------------------------------------------------------------------------------------------------------------------------------------------------------------------------------------------------------------------------------------------------------------------------------------------------------------------------------------------------------------------------------------------------------------------------------------------------------------------------------------------------------------------------------------------------------------------------------------------------------------------------------------------------------------------------------------------------------------------------------------------------------------------------------|
| <b>GENERAL COMMENTS</b> | <ul style="list-style-type: none"> <li>- The introductory LR is weak. More local and South Asian scholarship about medical and dental students during pandemic can be cited from last two years</li> <li>- More information is needed about the manual data analysis and theme generation. How many authors did this independently? were discussions held? was there disagreement? why a software was not used</li> <li>- Qualitative data analysis reliability has not been reported, for example peer review, participant review</li> <li>- The discussion is weak and limited. Results can be discussed better with reference to scholarship</li> <li>- There should be a separate Limitations section</li> <li>- Regulatory bodies and stakeholders, and their related policy post pandemic outbreak must be discussed and then further recommendations mentioned based on study findings</li> </ul> |
|-------------------------|----------------------------------------------------------------------------------------------------------------------------------------------------------------------------------------------------------------------------------------------------------------------------------------------------------------------------------------------------------------------------------------------------------------------------------------------------------------------------------------------------------------------------------------------------------------------------------------------------------------------------------------------------------------------------------------------------------------------------------------------------------------------------------------------------------------------------------------------------------------------------------------------------------|

|                        |                                                                                           |
|------------------------|-------------------------------------------------------------------------------------------|
| <b>REVIEWER</b>        | Kiran Patel<br>University Hospitals Coventry and Warwickshire NHS Trust,<br>WISDEM Centre |
| <b>REVIEW RETURNED</b> | 15-Sep-2022                                                                               |

|                         |                                                                                                                                                                                                                          |
|-------------------------|--------------------------------------------------------------------------------------------------------------------------------------------------------------------------------------------------------------------------|
| <b>GENERAL COMMENTS</b> | A well defined and clear qualitative study with clear Qs. The learning is important to share and I see no need for revision aside from checking grammar to ensure it is up to standard. Well done and a pleasure to read |
|-------------------------|--------------------------------------------------------------------------------------------------------------------------------------------------------------------------------------------------------------------------|

### VERSION 1 – AUTHOR RESPONSE

| <b>Reviewer 1 comments</b>                                                                                                              | <b>Authors' response</b>                                    | <b>Page number</b> |
|-----------------------------------------------------------------------------------------------------------------------------------------|-------------------------------------------------------------|--------------------|
| The introductory LR is weak. More local and South Asian scholarship about medical and dental students during pandemic can be cited from | Recent references have been added focusing on local studies | Pg # 4             |

|                                                                                                                                                                                                                          |                                                                                                                                                                              |                    |
|--------------------------------------------------------------------------------------------------------------------------------------------------------------------------------------------------------------------------|------------------------------------------------------------------------------------------------------------------------------------------------------------------------------|--------------------|
| last two years                                                                                                                                                                                                           |                                                                                                                                                                              |                    |
| More information is needed about the manual data analysis and theme generation. How many authors did this independently? were discussions held? was there disagreement? why a software was not used                      | Reason for preferring manual analysis of data has been mentioned and highlighted in the manuscript                                                                           | Pg # 6             |
| Qualitative data analysis reliability has not been reported, for example peer review, participant review                                                                                                                 | Reliability check was mentioned on page 6 and has now been elaborated and highlighted                                                                                        | Pg # 6 & 7         |
| The discussion is weak and limited. Results can be discussed better with reference to scholarship                                                                                                                        | New references added in discussion                                                                                                                                           | Pg # 12            |
| There should be a separate Limitations section                                                                                                                                                                           | Done and highlighted                                                                                                                                                         | Pg # 12            |
| Regulatory bodies and stakeholders, and their related policy post pandemic outbreak must be discussed and then further recommendations mentioned based on study findings                                                 | Separate heading for "Recommendations" has been highlighted. Last paragraph of recommendation for institutions explains why policies have not been discussed in this article | Pg # 12            |
| <b>Reviewer 2 comments</b>                                                                                                                                                                                               | <b>Authors' response</b>                                                                                                                                                     | <b>Page number</b> |
| A well defined and clear qualitative study with clear Qs. The learning is important to share and I see no need for revision aside from checking grammar to ensure it is up to standard. Well done and a pleasure to read | All authors would like to thank the reviewer for their kind words and encouragement. The article was proofread by all authors and was sent to the English department as well |                    |
