# Supplementary material for: Experiences of medical and dental students of Pakistan during COVID-19 pandemic lockdown: a qualitative study
Source: PubMed Central journal article supplement — BMJ Open. 2022 Nov 30;12(11):e066442. doi: 10.1136/bmjopen-2022-066442 (PMC9716407; doi:10.1136/bmjopen-2022-066442), 2022-11-30
Supplement: bmjopen-2022-066442supp001.pdf [file bmjopen-2022-066442supp001.pdf]

## Interview Guide

After maintaining an initial rapport with the participant, the following questions were asked:

| Themes              | Main Questions                                                           | Prompts                                                                                                                                                                                                                                                                  |
|---------------------|--------------------------------------------------------------------------|--------------------------------------------------------------------------------------------------------------------------------------------------------------------------------------------------------------------------------------------------------------------------|
| General Experience  | What is your experience of COVID 19?                                     | <ol style="list-style-type: none"> <li>1. What were the good things about the lockdown? If any</li> <li>2. What were the bad things about the lockdown, if any?</li> <li>3. How would you describe your feelings during this time</li> </ol>                             |
| Academic experience | How has COVID 19 affected you academically?                              | <ol style="list-style-type: none"> <li>1. How did you cope up with studies?</li> <li>2. How was your experience with online teaching and learning?</li> <li>3. How did it affect your interaction with teachers and peers?</li> </ol>                                    |
| Personal experience | How has COVID 19 affected you personally?                                | <ol style="list-style-type: none"> <li>1. How was your interaction with family and friends during this time?</li> <li>2. How did you pass time or kept yourself busy?</li> <li>3. Do you want to tell us about any hobbies that you pursued during this time?</li> </ol> |
| Future expectations | How do you feel about going back to college when the lockdown is lifted? | <ol style="list-style-type: none"> <li>1. How do you think it will affect your lives when you go back to college?</li> <li>2. Are there any suggestions or comments you want to give?</li> </ol>                                                                         |

The prompts and further explanatory questions were asked during the interviews to get insight into the comments of participants. The interviews were done in Urdu or English depending on the participant's preference. The audio recording was done and field notes were taken.
